# Supplementary material for: Comparison of Melphalan Combined with Treosulfan or Busulfan as High-Dose Chemotherapy before Autologous Stem Cell Transplantation in AML
Source: MDPI journal article supplement (doi:10.3390/cancers14041024), 2022-02-17
Supplement: s1 [file s1]

## Supplementary Materials

# Comparison of Melphalan Combined with Treosulfan or Busulfan as High-Dose Chemotherapy before Autologous Stem Cell Transplantation in AML

Ekaterina Gurevich, Michael Hayoz, Yolanda Aebi, Carlo R. Largiadèr, Behrouz Mansouri Taleghani, Ulrike Bacher and Thomas Pabst

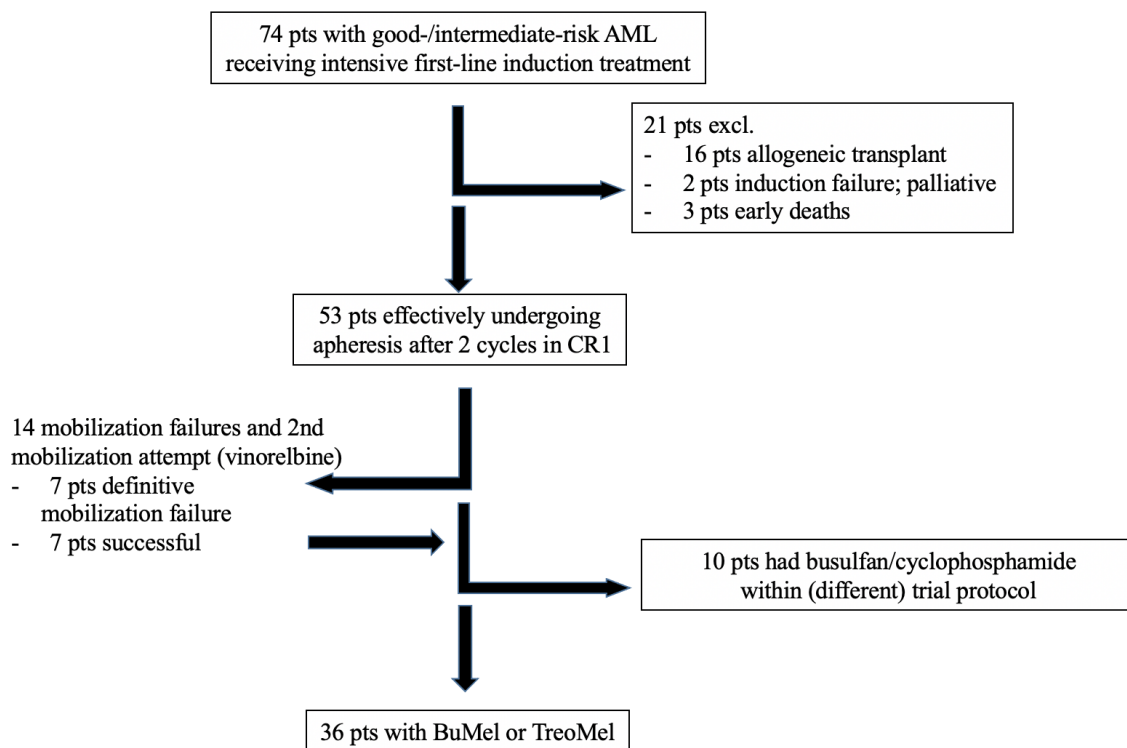

**Figure S1.** Flowchart visualizing the inclusion of patients. BuMel: Busulfan + Melphalan patient cohort, TreoMel: Treosulfan + Melphalan patient cohort, AML: Acute Myeloid Leukemia, CR: Complete Remission, Pts: Patients, excl.: excluded.

**Table S1.** Cytogenetic and molecular abnormalities at diagnosis (BuMel  $n = 16$ , TreoMel  $n = 20$ ).

| Genetic Abnormalities   | BuMel ( $n = 16$ ) | TreoMel ( $n = 20$ ) | All patients ( $n = 36$ ) | $p$ -value |
|-------------------------|--------------------|----------------------|---------------------------|------------|
| Karyotypes              |                    |                      |                           |            |
| Normal karyotype        | 13 (81%)           | 12 (60%)             | 25 (70)                   | 0.277      |
| t(9;11)(p21;q23)        | 0 (0%)             | 1 (5%)               | 1 (3%)                    | 0.999      |
| t(8;21)(q22;q22)        | 0 (0%)             | 2 (10%)              | 2 (6%)                    | 0.492      |
| inv(16)(p13.1q22)       | 1 (6%)             | 3 (15%)              | 4 (11%)                   | 0.613      |
| del(9q)                 | 1 (6%)             | 0 (0%)               | 1 (3%)                    | 0.999      |
| Independent clones      | 0 (0%)             | 1 (5%)               | 1 (3%)                    | 0.999      |
| Complex karyotype       | 1 (5%)             | 1 (5%)               | 2 (6%)                    | 0.999      |
| Molecular aberrations   |                    |                      |                           |            |
| AML1-ETO (RUNX1/RUNXT1) | 0 (0%)             | 2 (10%)              | 2 (6%)                    | 0.492      |
| ASXL1                   | 1 (6%)             | 0 (0%)               | 1 (3%)                    | 0.999      |
| BCOR                    | 1 (6%)             | 0 (0%)               | 1 (3%)                    | 0.999      |

|                                  |         |         |          |       |
|----------------------------------|---------|---------|----------|-------|
| <i>BCR-ABL1</i>                  | 1 (6%)  | 0 (0%)  | 1 (3%)   | 0.999 |
| <i>CBL</i>                       | 1 (6%)  | 0 (0%)  | 1 (3%)   | 0.999 |
| <i>CEBPA</i>                     | 1 (6%)  | 1 (5%)  | 2 (6%)   | 0.999 |
| <i>c-KIT</i>                     | 1 (6%)  | 2 (10%) | 3 (8%)   | 0.999 |
| <i>DNMT3A</i>                    | 3 (19%) | 2 (10%) | 5 (14%)  | 0.637 |
| <i>ETV6</i>                      | 0 (0%)  | 1 (5%)  | 1 (3%)   | 0.999 |
| <i>FLT3-ITD</i>                  | 3 (19%) | 4 (20%) | 7 (20%)  | 0.999 |
| <i>FLT3-TKD</i>                  | 2 (13%) | 4 (20%) | 6 (17%)  | 0.672 |
| <i>IDH1</i>                      | 1 (6%)  | 0 (0%)  | 1 (3%)   | 0.999 |
| <i>IDH2</i>                      | 5 (31%) | 6 (30%) | 11 (31%) | 0.999 |
| <i>inv(16)/CBFB-MYH11</i>        | 1 (6%)  | 3 (15%) | 4 (11%)  | 0.613 |
| <i>KIT D816V</i>                 | 1 (6%)  | 0 (0%)  | 1 (3%)   | 0.999 |
| <i>KRAS</i>                      | 0 (0%)  | 1 (5%)  | 1 (3%)   | 0.999 |
| <i>MLL (KMT2A) rearrangement</i> | 0 (0%)  | 1 (5%)  | 1 (3%)   | 0.999 |
| <i>NF1</i>                       | 0 (0%)  | 2 (10%) | 2 (6%)   | 0.492 |
| <i>NPM1 mutation</i>             | 8 (50%) | 8 (40%) | 16 (44%) | 0.737 |
| <i>NRAS</i>                      | 0 (0%)  | 2 (10%) | 2 (6%)   | 0.492 |
| <i>PHF6</i>                      | 0 (0%)  | 1 (5%)  | 1 (3%)   | 0.999 |
| <i>RUNX1</i>                     | 2 (13%) | 1 (5%)  | 3 (8%)   | 0.574 |
| <i>SRSF1</i>                     | 1 (6%)  | 0 (0%)  | 1 (3%)   | 0.999 |
| <i>SRSF2</i>                     | 1 (6%)  | 2 (10%) | 3 (8%)   | 0.999 |
| <i>TET2</i>                      | 3 (19%) | 1 (5%)  | 4 (11%)  | 0.303 |
| <i>TP53</i>                      | 0 (0%)  | 1 (5%)  | 1 (3%)   | 0.999 |

BuMel: Busulfan + Melphalan patient cohort, TreoMel: Treosulfan + Melphalan patient cohort.

Table S2. Overview of all toxicities experienced by patients in both cohorts.

| System Organ Class (SOC)                             |                               | Grade I             |                       | Grade II            |                       | Grade III           |                       | Grade IV            |                       | p     |
|------------------------------------------------------|-------------------------------|---------------------|-----------------------|---------------------|-----------------------|---------------------|-----------------------|---------------------|-----------------------|-------|
|                                                      |                               | BuMel n = 16<br>(%) | TreoMel n = 20<br>(%) | BuMel n = 16<br>(%) | TreoMel n = 20<br>(%) | BuMel n = 16<br>(%) | TreoMel n = 20<br>(%) | BuMel n = 16<br>(%) | TreoMel n = 20<br>(%) |       |
| Metabolism and nutrition disorders                   | Decreased appetite            | 18.75               | 10                    | 6.25                | 40                    | 75                  | 50                    | 0                   | 0                     | 0.999 |
|                                                      | Electrolyte imbalance         | 56.25               | 85                    | 31.25               | 15                    | 12.5                | 0                     | 0                   | 0                     | 0.999 |
|                                                      | Hyperglycemia                 | 12.5                | 5                     | 81.25               | 90                    | 0                   | 0                     | 0                   | 0                     | 0.999 |
| Gastrointestinal disorders                           | Diarrhea                      | 50                  | 30                    | 0                   | 20                    | 25                  | 40                    | 0                   | 0                     | 0.374 |
|                                                      | Vomiting                      | 81.25               | 55                    | 0                   | 5                     | 0                   | 0                     | 0                   | 0                     | 0.277 |
|                                                      | Nausea                        | 87.5                | 50                    | 0                   | 20                    | 0                   | 0                     | 0                   | 0                     | 0.257 |
|                                                      | Mucositis                     | 31.25               | 35                    | 6.25                | 10                    | 18.75               | 15                    | 0                   | 0                     | 0.999 |
|                                                      | Constipation                  | 68.75               | 55                    | 0                   | 10                    | 0                   | 0                     | 0                   | 0                     | 0.999 |
|                                                      | Colitis (neutropenic)         | 0                   | 15                    | 31.25               | 40                    | 0                   | 0                     | 0                   | 0                     | 0.191 |
|                                                      | Abdominal pain                | 31.25               | 30                    | 12.5                | 10                    | 0                   | 0                     | 0                   | 0                     | 0.999 |
|                                                      | Dysphagia                     | 6.25                | 5                     | 6.25                | 0                     | 0                   | 5                     | 0                   | 0                     | 0.999 |
|                                                      | Gastrointestinal Reflux       | 37.5                | 0                     | 0                   | 0                     | 0                   | 0                     | 0                   | 0                     | 0.004 |
|                                                      | Fatigue                       | 81.25               | 55                    | 12.5                | 0                     | 0                   | 0                     | 0                   | 0                     | 0.022 |
| General disorders and administration site conditions | Edema limbs                   | 50                  | 45                    | 0                   | 0                     | 0                   | 0                     | 0                   | 0                     | 0.999 |
|                                                      | Non-cardiac chest pain        | 6.25                | 0                     | 0                   | 10                    | 0                   | 5                     | 0                   | 0                     | 0.613 |
| Renal/urinary disorders                              | Acute Kidney Injury           | 0                   | 0                     | 0                   | 0                     | 12.5                | 5                     | 0                   | 0                     | 0.574 |
| Nervous system disorders                             | Headache                      | 12.5                | 15                    | 0                   | 5                     | 0                   | 0                     | 0                   | 0                     | 0.672 |
|                                                      | Peripheral sensory neuropathy | 12.5                | 5                     | 0                   | 0                     | 0                   | 0                     | 0                   | 0                     | 0.574 |
|                                                      | Seizure                       | 0                   | 0                     | 6.25                | 0                     | 0                   | 0                     | 0                   | 0                     | 0.444 |
|                                                      | Dysgeusia                     | 43.75               | 35                    | 0                   | 0                     | 0                   | 0                     | 0                   | 0                     | 0.734 |
|                                                      | Dizziness                     | 25                  | 20                    | 6.25                | 0                     | 0                   | 0                     | 0                   | 0                     | 0.470 |
|                                                      | Tremor                        | 18.75               | 10                    | 0                   | 0                     | 0                   | 0                     | 0                   | 0                     | 0.637 |
|                                                      | Encephalopathy                | 6.25                | 0                     | 6.25                | 0                     | 0                   | 0                     | 0                   | 0                     | 0.191 |
| Respiratory, thoracic, and mediastinal disorders     | Oropharyngeal Pain            | 62.5                | 40                    | 25                  | 15                    | 0                   | 10                    | 0                   | 0                     | 0.245 |
|                                                      | Epistaxis                     | 0                   | 0                     | 0                   | 0                     | 43.75               | 15                    | 0                   | 0                     | 0.073 |
|                                                      | Hiccups                       | 0                   | 5                     | 6.25                | 5                     | 6.25                | 0                     | 0                   | 0                     | 0.999 |
| Infections                                           | Thrush                        | 12.5                | 40                    | 6.25                | 0                     | 12.5                | 0                     | 0                   | 0                     | 0.731 |
|                                                      | Pharyngitis                   | 0                   | 0                     | 25                  | 20                    | 0                   | 0                     | 0                   | 0                     | 0.999 |
|                                                      | Bacteremia                    | 0                   | 0                     | 43.75               | 35                    | 0                   | 0                     | 0                   | 0                     | 0.734 |
|                                                      | Sepsis                        | 0                   | 0                     | 0                   | 0                     | 0                   | 0                     | 0                   | 5                     | 0.999 |
|                                                      | Lung infection                | 0                   | 0                     | 6.25                | 5                     | 6.25                | 0                     | 0                   | 5                     | 0.999 |
|                                                      | Catheter-site infections      | 0                   | 0                     | 12.5                | 5                     | 12.5                | 0                     | 0                   | 0                     | 0.149 |
|                                                      | Skin infection                | 18.75               | 0                     | 0                   | 0                     | 0                   | 0                     | 0                   | 0                     | 0.078 |
|                                                      | Vaginal infection             | 6.25                | 0                     | 0                   | 0                     | 0                   | 0                     | 0                   | 0                     | 0.444 |
| Skin and subcutaneous disorders                      | Purpura                       | 87.5                | 70                    | 0                   | 0                     | 0                   | 0                     | 0                   | 0                     | 0.246 |

|                                                 |                              |       |    |      |      |       |    |      |   |        |
|-------------------------------------------------|------------------------------|-------|----|------|------|-------|----|------|---|--------|
|                                                 | Irreversible alopecia        | 18.75 | 0  | 25   | 0    | 0     | 0  | 0    | 0 | 0.0014 |
|                                                 | Rash maculo-papular          | 6.25  | 20 | 0    | 10   | 0     | 0  | 0    | 0 | 0.104  |
|                                                 | Pruritus                     | 12.5  | 30 | 0    | 0    | 0     | 0  | 0    | 0 | 0.257  |
|                                                 | Nail loss                    | 6.25  | 5  | 25   | 0    | 0     | 0  | 0    | 0 | 0.069  |
|                                                 | Hyperhidrosis                | 18.75 | 10 | 0    | 0    | 0     | 0  | 0    | 0 | 0.637  |
| Laboratory parameters                           | Liver enzymes increased      | 43.75 | 35 | 25   | 35   | 25    | 20 | 6.25 | 0 | 0.492  |
|                                                 | Blood LDH increased          | 62.5  | 40 | 0    | 0    | 0     | 0  | 0    | 0 | 0.315  |
|                                                 | Hyperuricemia                | 6.25  | 10 | 0    | 0    | 0     | 0  | 0    | 0 | 0.999  |
| Musculoskeletal and connective tissue disorders | Bone Pain                    | 43.75 | 45 | 0    | 0    | 0     | 0  | 0    | 0 | 0.999  |
| Vascular disorders                              | Hypotension                  | 43.75 | 20 | 0    | 6.67 | 0     | 0  | 0    | 0 | 0.082  |
|                                                 | Hypertension                 | 6.25  | 10 | 0    | 15   | 0     | 0  | 0    | 0 | 0.196  |
|                                                 | Thromboembolic event         | 0     | 0  | 6.25 | 0    | 0     | 0  | 0    | 0 | 0.444  |
| Psychiatric disorders                           | Insomnia                     | 18.75 | 20 | 0    | 0    | 0     | 0  | 0    | 0 | 0.999  |
| Eye disorders                                   | Dry eye                      | 0     | 0  | 6.25 | 0    | 0     | 0  | 0    | 0 | 0.444  |
|                                                 | Floaters                     | 6.25  | 0  | 0    | 0    | 0     | 0  | 0    | 0 | 0.444  |
| Hepatobiliary disorders                         | Ocular icterus               | 6.25  | 10 | 0    | 0    | 0     | 0  | 0    | 0 | 0.999  |
|                                                 | Veno-occlusive disease       | 0     | 0  | 0    | 0    | 0     | 0  | 0    | 0 | 0.999  |
| Cardiac disorders                               | Sinus Tachycardia            | 6.25  | 0  | 6.25 | 0    | 0     | 0  | 0    | 0 | 0.191  |
|                                                 | Sinus Bradycardia            | 6.25  | 0  | 0    | 0    | 0     | 0  | 0    | 0 | 0.444  |
| Immune system disorders                         | Others: Engraftment Syndrome | 0     | 0  | 0    | 0    | 31.25 | 20 | 0    | 0 | 0.470  |
| Injury, poisoning, and procedural complications | Graft failure                | 0     | 0  | 0    | 0    | 5     | 0  | 0    | 0 | 0.999  |

BuMel: Busulfan + Melphalan patient cohort, TreoMel: Treosulfan + Melphalan patient cohort.
